# Supplementary material for: Cannabis Use and CKD: Epidemiological Associations and Mendelian Randomization
Source: PubMed Central journal article supplement (PMC9879977; doi:10.1016/j.xkme.2022.100582), 2022-12-11
Supplement: mmc1.pdf [file mmc1.pdf]

**Figure S1.** Leave one out analysis for CKD.

As a sensitivity analysis, each SNP was sequentially excluded from the genetic instruments to identify outlier SNPs. Plots include odds ratios of each leave-one-out model for CAD using genetic instruments for cannabis use disorder ( $P < 1 \times 10^{-7}$ ).

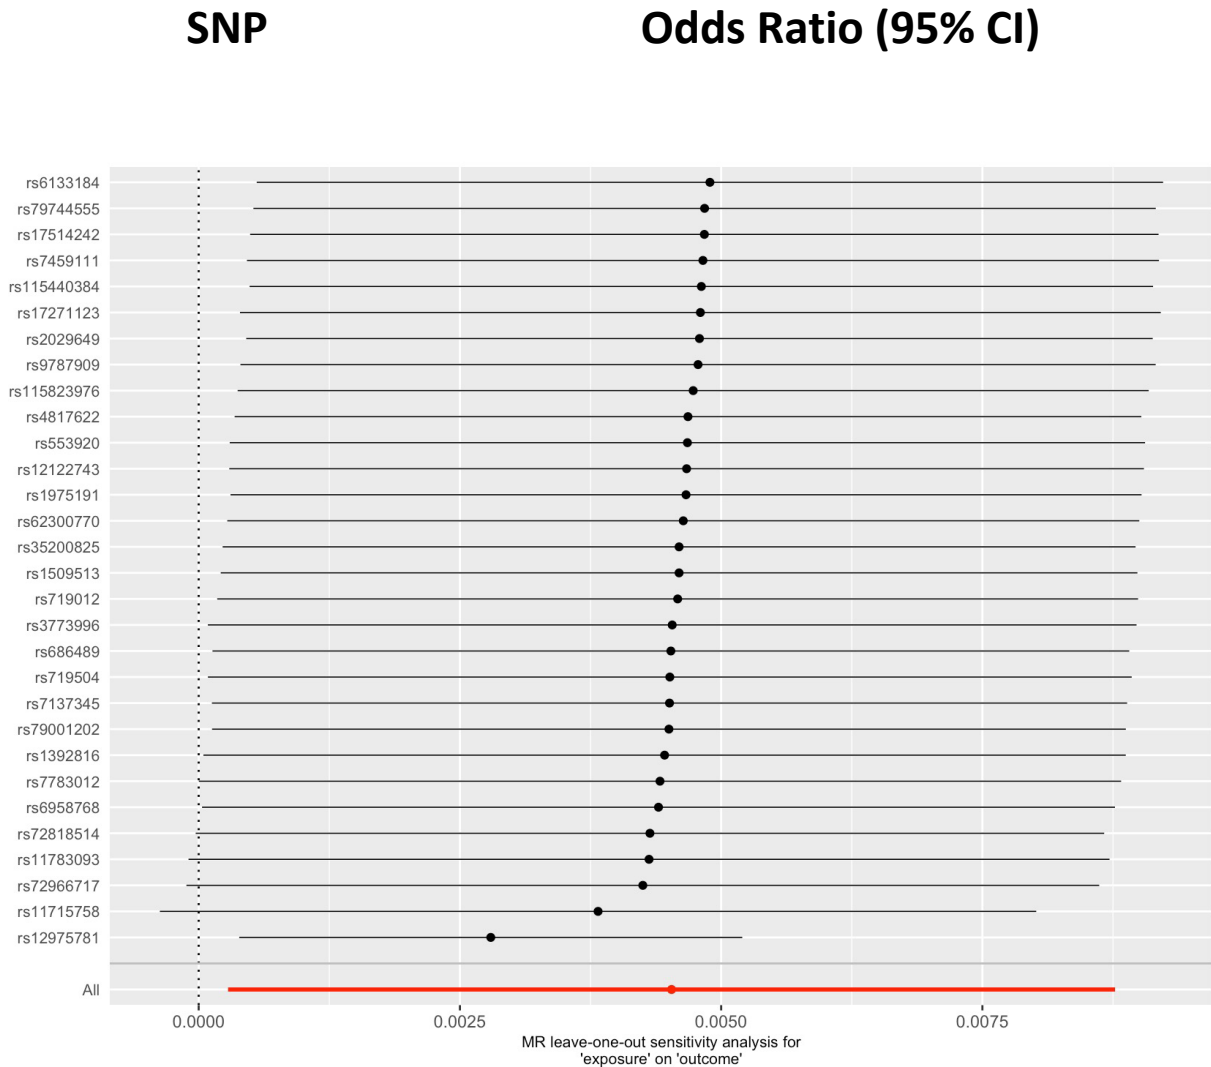

## **Item S1. Supplementary Methods**

Questions in All of Us survey about cannabis consumption:

1. Have you smoked at least 100 cigarettes in your entire life? (There are 20 cigarettes in a pack.)?

Answers: Yes, no

2. In your LIFETIME, which of the following substances have you ever used?

Answers: Marijuana (cannabis, pot, grass, hash, weed, etc.). Other answers are included in the All of Us Lifestyle survey and omitted here for brevity.

3. In the PAST THREE MONTHS, how often have you used marijuana (cannabis, pot, grass, hash, etc.)?

Answers: Never, once or twice, monthly, weekly, daily.

4. Are you covered by health insurance or some other kind of health care plan? Answers: Yes, no

5. What is the highest grade or year of school you completed?

Answers: College graduate or advanced degree, 1-3 years of college, 12th or GED, Less than a high school degree

**Supplementary Table 1.** All of Us cohort summary (cannabis use frequency). Demographics and clinical history summarized by 3-month cannabis use frequency in the All of Us cohort are provided. Only individuals who reported lifetime cannabis use and also reported cannabis use frequency in the three months prior to enrollment were included. Individuals who answered, "Prefer not to answer" or who skipped the cannabis use frequency question in the survey were excluded. Sex at birth, age, BMI, and cigarette use were ascertained using physical measurements and surveys administered at the time of enrollment in All of Us. Medical history was obtained from EHR data as well as self-reported survey data.

| Variable                                             | Three-month cannabis use frequency |                                       |                           |                          |                         |                                            | P Value |
|------------------------------------------------------|------------------------------------|---------------------------------------|---------------------------|--------------------------|-------------------------|--------------------------------------------|---------|
|                                                      | Never<br>(N =<br>39,996)           | Once<br>or<br>twice<br>(N =<br>8,921) | Monthly<br>(N =<br>2,133) | Weekly<br>(N =<br>2,790) | Daily<br>(N =<br>4,820) | Prefer<br>not to<br>answer<br>(N =<br>865) |         |
| <b>Sex at birth, n (%)</b>                           |                                    |                                       |                           |                          |                         |                                            |         |
| <b>Male</b>                                          | 15,073<br>(38%)                    | 3,688<br>(41%)                        | 1,030<br>(48%)            | 1,380<br>(49%)           | 2,146<br>(45%)          | 397<br>(46%)                               | <0.001  |
| <b>Race, n (%)</b>                                   |                                    |                                       |                           |                          |                         |                                            |         |
| <b>Asian</b>                                         | 1,137<br>(2.8%)                    | 347<br>(3.9%)                         | 55<br>(2.6%)              | 55<br>(2.0%)             | 38<br>(0.8%)            | 15<br>(1.7%)                               | <0.001  |
| <b>Black or African American</b>                     | 7,402<br>(19%)                     | 3,685<br>(41%)                        | 1,185<br>(56%)            | 1,406<br>(50%)           | 2,772<br>(58%)          | 551<br>(64%)                               |         |
| <b>More than one population</b>                      | 892<br>(2.2%)                      | 269<br>(3.0%)                         | 54<br>(2.5%)              | 82<br>(2.9%)             | 150<br>(3.1%)           | 18<br>(2.1%)                               |         |
| <b>Other</b>                                         | 618<br>(1.5%)                      | 195<br>(2.2%)                         | 42<br>(2.0%)              | 60<br>(2.2%)             | 118<br>(2.4%)           | 33<br>(3.8%)                               |         |
| <b>White</b>                                         | 29,947<br>(75%)                    | 4,425<br>(50%)                        | 797<br>(37%)              | 1,187<br>(43%)           | 1,742<br>(36%)          | 248<br>(29%)                               |         |
| <b>Age (years), Median (IQR)</b>                     | 59 (41, 69)                        | 44 (31, 59)                           | 45 (32, 60)               | 45 (32, 60)              | 41 (32, 55)             | 47 (34, 59)                                | <0.001  |
| <b>BMI (kg/m<sup>2</sup>), Median (IQR)</b>          | 28 (24, 34)                        | 27 (23, 33)                           | 27 (23, 32)               | 27 (23, 32)              | 27 (23, 33)             | 27 (23, 32)                                | <0.001  |
| <b>Chronic kidney disease, n (%)</b>                 | 1,458<br>(3.6%)                    | 235<br>(2.6%)                         | 58<br>(2.7%)              | 96<br>(3.4%)             | 161<br>(3.3%)           | 21<br>(2.4%)                               |         |
| <b>Hypertension, n (%)</b>                           | 10,818<br>(27%)                    | 1,822<br>(20%)                        | 437<br>(20%)              | 658<br>(24%)             | 1,116<br>(23%)          | 199<br>(23%)                               | <0.001  |
| <b>Type 2 diabetes, n (%)</b>                        | 1,802<br>(4.5%)                    | 321<br>(3.6%)                         | 70<br>(3.3%)              | 95<br>(3.4%)             | 198<br>(4.1%)           | 30<br>(3.5%)                               | <0.001  |
| <b>Coronary artery disease, n (%)</b>                | 2,737<br>(6.8%)                    | 372<br>(4.2%)                         | 81<br>(3.8%)              | 128<br>(4.6%)            | 236<br>(4.9%)           | 37<br>(4.3%)                               | <0.001  |
| <b>Hyperlipidemia, n (%)</b>                         | 9,359<br>(23%)                     | 1,185<br>(13%)                        | 243<br>(11%)              | 393<br>(14%)             | 638<br>(13%)            | 101<br>(12%)                               | <0.001  |
| <b>&gt; 100 cigarettes smoked in lifetime, n (%)</b> |                                    |                                       |                           |                          |                         |                                            | <0.001  |

|                             |                 |                |                |                |                |              |              |        |
|-----------------------------|-----------------|----------------|----------------|----------------|----------------|--------------|--------------|--------|
| <b>Yes</b>                  | 16,932<br>(42%) | 3,837<br>(43%) | 1,068<br>(50%) | 1,547<br>(55%) | 3,044<br>(63%) | 503<br>(58%) | 290<br>(64%) |        |
| <b>Has health insurance</b> |                 |                |                |                |                |              |              | <0.001 |
| <b>Yes</b>                  | 38,531<br>(96%) | 8,064<br>(90%) | 1,865<br>(87%) | 2,436<br>(87%) | 4,178<br>(87%) | 721<br>(83%) | 399<br>(89%) |        |

**Supplementary Table 2. Genetic instruments for cannabis use**

Genome wide association study summary statistics for SNPs selected in cannabis use instruments. The main instruments were selected using a liberal instrument selection approach ( $P < 5 \times 10^{-6}$ ) variants in a GWAS for CUD. The alternative instruments include independent SNPs meeting a genome wide significance threshold ( $P < 5 \times 10^{-8}$ ) for CUD. SNPs were assigned to genes using dbSNP annotations.

| Instrument                                       | SNP         | Gene name    | Effect Allele | Non effect allele | Beta  | SE     | P value  | F statistic |
|--------------------------------------------------|-------------|--------------|---------------|-------------------|-------|--------|----------|-------------|
| Liberal P value threshold ( $5 \times 10^{-6}$ ) | rs115440384 | None         | T             | C                 | 0.274 | 0.0593 | 3.73E-06 | 21.38088    |
|                                                  | rs115823976 | CALCR L      | A             | G                 | -0.25 | 0.0518 | 2.21E-06 | 22.37034    |
|                                                  | rs11715758  | GNAI2        | A             | G                 | -0.09 | 0.0175 | 8.91E-08 | 28.54612    |
|                                                  | rs11783093  | EPHX2        | T             | C                 | -0.15 | 0.0244 | 2.68E-09 | 35.31477    |
|                                                  | rs12122743  | None         | A             | G                 | -0.08 | 0.0175 | 1.32E-06 | 23.3151     |
|                                                  | rs12975781  | IZUMO 1      | T             | C                 | -0.08 | 0.0176 | 1.66E-06 | 22.83319    |
|                                                  | rs1392816   | PDE4B        | T             | C                 | -0.1  | 0.0184 | 6.14E-08 | 29.41883    |
|                                                  | rs1509513   | LOC107984390 | A             | G                 | 0.086 | 0.0168 | 3.18E-07 | 26.02214    |
|                                                  | rs17271123  | None         | T             | G                 | 0.128 | 0.0252 | 3.54E-07 | 25.96145    |
|                                                  | rs17514242  | TCF4         | C             | G                 | -0.09 | 0.0171 | 2.56E-07 | 26.48336    |
|                                                  | rs1975191   | None         | T             | G                 | -0.09 | 0.0192 | 3.20E-06 | 21.68066    |
|                                                  | rs2029649   | LOC105377408 | T             | C                 | 0.079 | 0.0167 | 2.18E-06 | 22.54828    |
|                                                  | rs35200825  | None         | T             | C                 | -0.31 | 0.0662 | 2.31E-06 | 22.34062    |
|                                                  | rs3773996   | IL1RAP       | A             | G                 | -0.25 | 0.051  | 1.07E-06 | 23.81823    |
|                                                  | rs4817622   | None         | A             | G                 | 0.078 | 0.0169 | 3.30E-06 | 21.52082    |
|                                                  | rs553920    | None         | T             | C                 | 0.104 | 0.0198 | 1.60E-07 | 27.58902    |
|                                                  | rs6133184   | SLC23A 2     | T             | C                 | 0.126 | 0.0261 | 1.22E-06 | 23.4538     |
|                                                  | rs62300770  | None         | T             | C                 | 0.09  | 0.019  | 2.18E-06 | 22.33806    |
|                                                  | rs686489    | None         | A             | G                 | 0.084 | 0.0179 | 2.52E-06 | 22.23202    |
|                                                  | rs6958768   | MAGI2        | A             | C                 | 0.11  | 0.0239 | 4.37E-06 | 21.02932    |

|                                                      |            |         |   |   |       |        |          |          |
|------------------------------------------------------|------------|---------|---|---|-------|--------|----------|----------|
|                                                      | rs7137345  | PKP2    | T | G | 0.096 | 0.0199 | 1.49E-06 | 23.17527 |
|                                                      | rs719012   | SHTN1   | T | C | 0.096 | 0.0187 | 2.87E-07 | 26.40971 |
|                                                      | rs719504   | None    | A | G | 0.103 | 0.0192 | 9.00E-08 | 28.50003 |
|                                                      | rs72818514 | ATP10B  | T | C | -0.18 | 0.0342 | 9.33E-08 | 28.56934 |
|                                                      | rs72966717 | None    | T | G | -0.11 | 0.0226 | 1.07E-06 | 23.86279 |
|                                                      | rs7459111  | None    | A | T | -0.09 | 0.0197 | 2.45E-06 | 22.23817 |
|                                                      | rs7783012  | FOXP2   | A | G | 0.101 | 0.0168 | 1.84E-09 | 36.143   |
|                                                      | rs79001202 | None    | A | T | -0.09 | 0.0195 | 3.55E-06 | 21.49155 |
|                                                      | rs79744555 | None    | T | C | 0.141 | 0.03   | 2.63E-06 | 22.05868 |
|                                                      | rs9787909  | METTL15 | A | C | 0.114 | 0.0225 | 4.52E-07 | 25.53618 |
| <b>Genome wide significant (5 x 10<sup>-8</sup>)</b> |            | EPHX2   |   |   | -0.11 | 0.0194 | 6.5E-09  |          |
|                                                      | rs4732724  |         | C | G | 0.114 | 0.0196 | 6.5E-09  | 33.711   |
|                                                      | rs7783012  | FOXP2   | A | G | 0.101 | 0.0168 | 1.8E-09  | 36.143   |
